# Supplementary material
Source: PubMed Central journal article supplement (PMC7769008)

## Supporting Information

### Identification of a new heterocyclic scaffold for inhibitors of the polo-box domain of Polo-like kinase 1

Celeste N. Alvarez,<sup>1,2 ‡</sup> Jung-Eun Park,<sup>1 ‡</sup> Kiran S. Toti,<sup>3</sup> Yangliu Xia,<sup>1</sup> Kristopher W. Krausz,<sup>1</sup> Ganesha Rai,<sup>2</sup> Jeong K. Bang,<sup>4</sup> Frank J. Gonzalez,<sup>1</sup> Kenneth A. Jacobson,<sup>3\*</sup> and Kyung S. Lee<sup>1\*</sup>

<sup>1</sup>Chemistry Section, Laboratory of Metabolism, National Cancer Institute, National Institutes of Health, Bethesda, MD, 20892, United States.

<sup>2</sup>Division of Preclinical Innovation, National Center for Advancing Translational Sciences, National Institutes of Health, Rockville, MD, 20850, United States.

<sup>3</sup>Molecular Recognition Section, Laboratory of Bioorganic Chemistry, National Institute of Diabetes and Digestive and Kidney Diseases, National Institutes of Health, Bethesda, MD, 20892, United States.

<sup>4</sup>Division of Magnetic Resonance, Korea Basic Science Institute, Cheongju 28119, Republic of Korea.

#### Table of Contents

##### 1. Supplementary Figures

|                 |   |
|-----------------|---|
| Figure S1 ..... | 2 |
| Figure S2 ..... | 4 |
| Figure S3 ..... | 6 |
| Figure S4 ..... | 7 |
| Figure S5 ..... | 8 |
| Figure S6 ..... | 9 |

##### 2. Supplementary Tables

|                |    |
|----------------|----|
| Table S1 ..... | 10 |
| Table S2 ..... | 11 |
| Table S3 ..... | 11 |

##### 3. HPLC purity, HRMS, and NMR data for selected tested analogs

|          |    |
|----------|----|
| 7.....   | 12 |
| 21.....  | 13 |
| 22.....  | 14 |
| 23.....  | 15 |
| 26.....  | 16 |
| 36.....  | 17 |
| 64.....  | 18 |
| 65.....  | 19 |
| 79.....  | 20 |
| 83.....  | 21 |
| 85.....  | 22 |
| 129..... | 23 |
| 134..... | 24 |

## Supplementary Figures

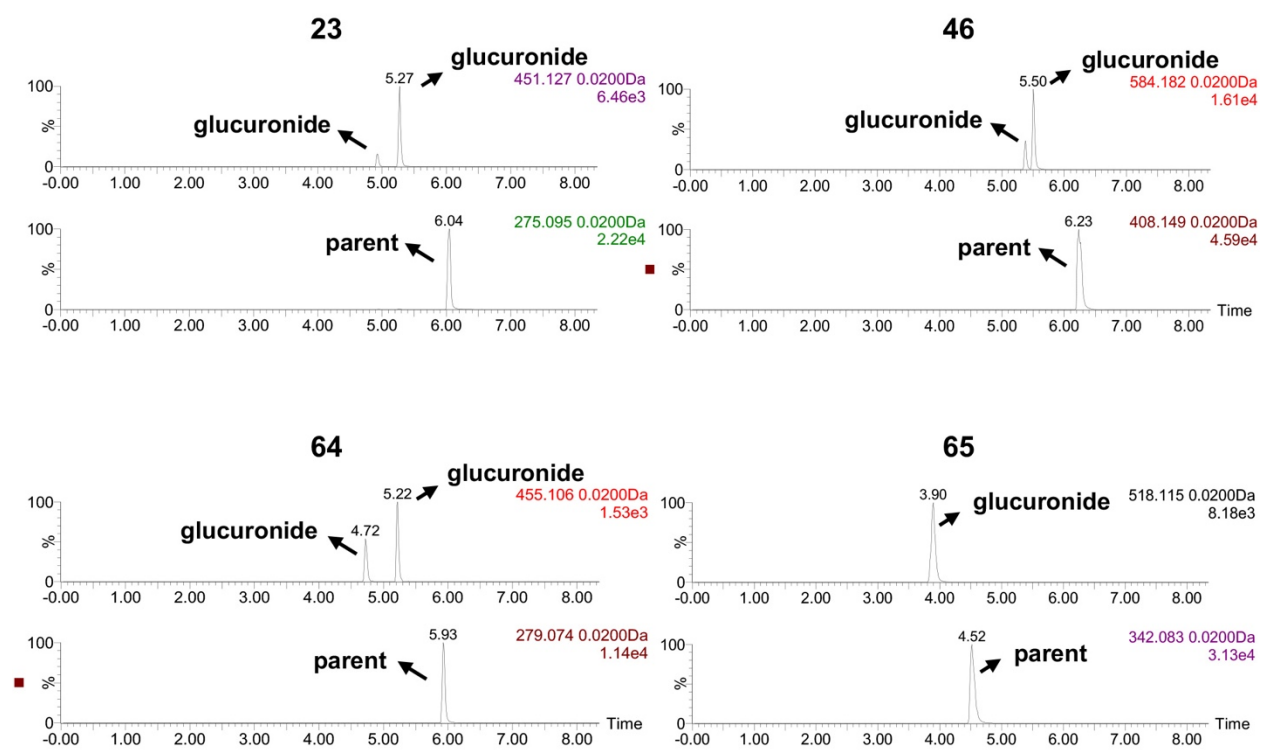

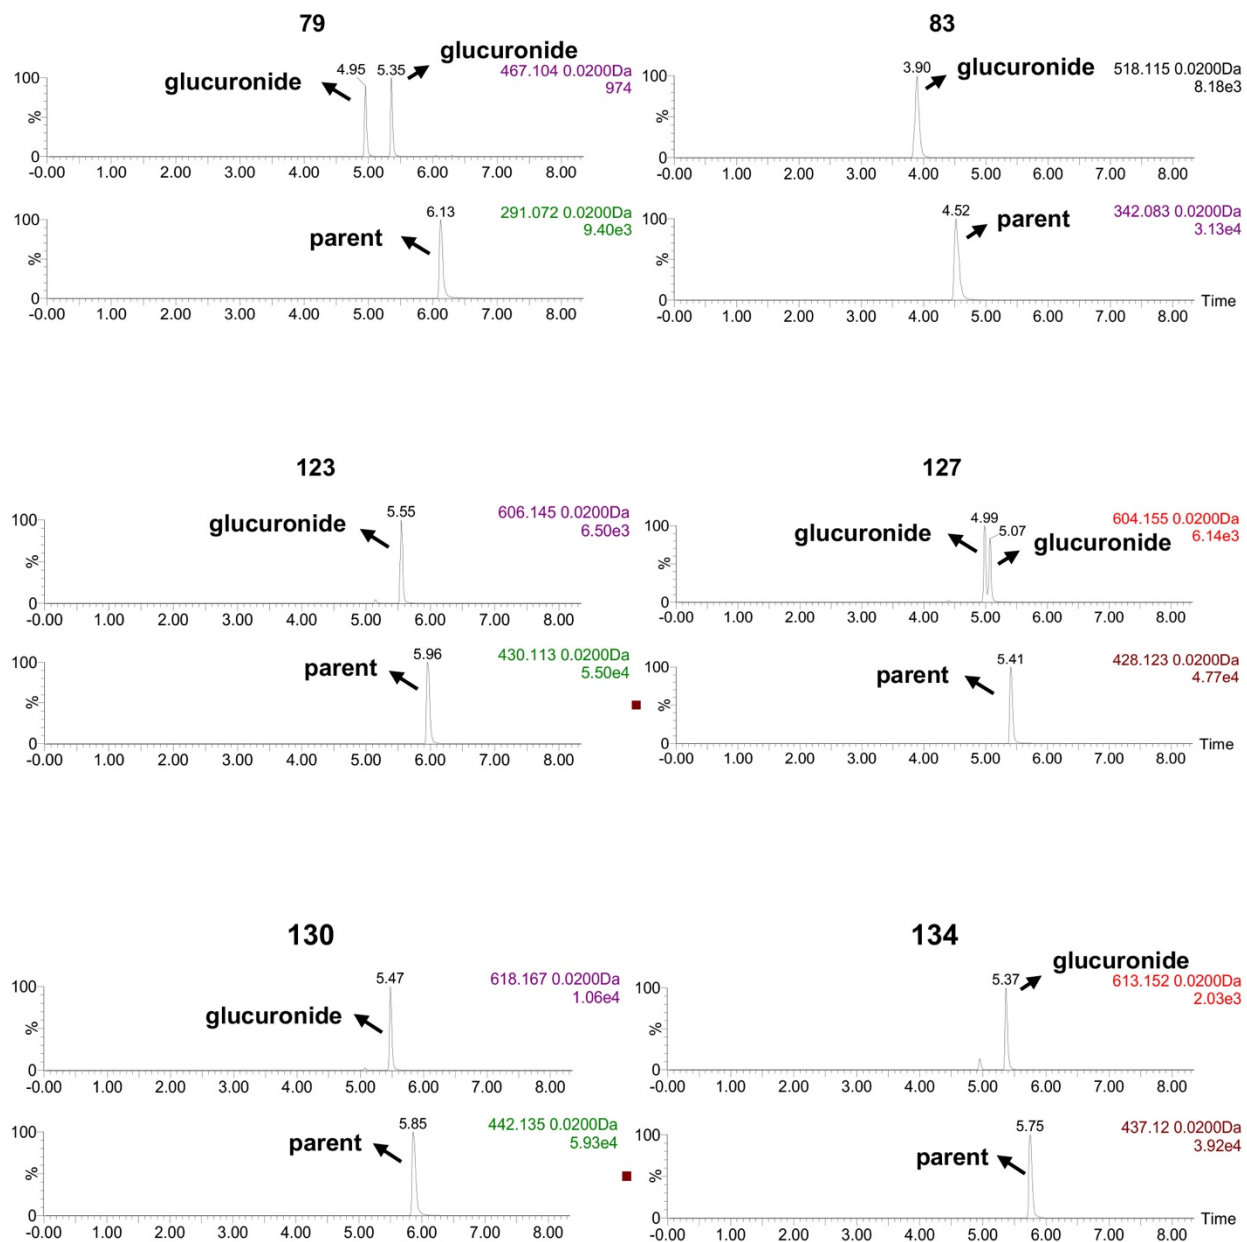

**Figure S1.** Extracted ion chromatograms of selected compounds and their glucuronides in MLM incubations with UDPGA after 60 min. Upper panels show extracted MS of glucuronidated product(s) and lower panels show extracted MS of parent.

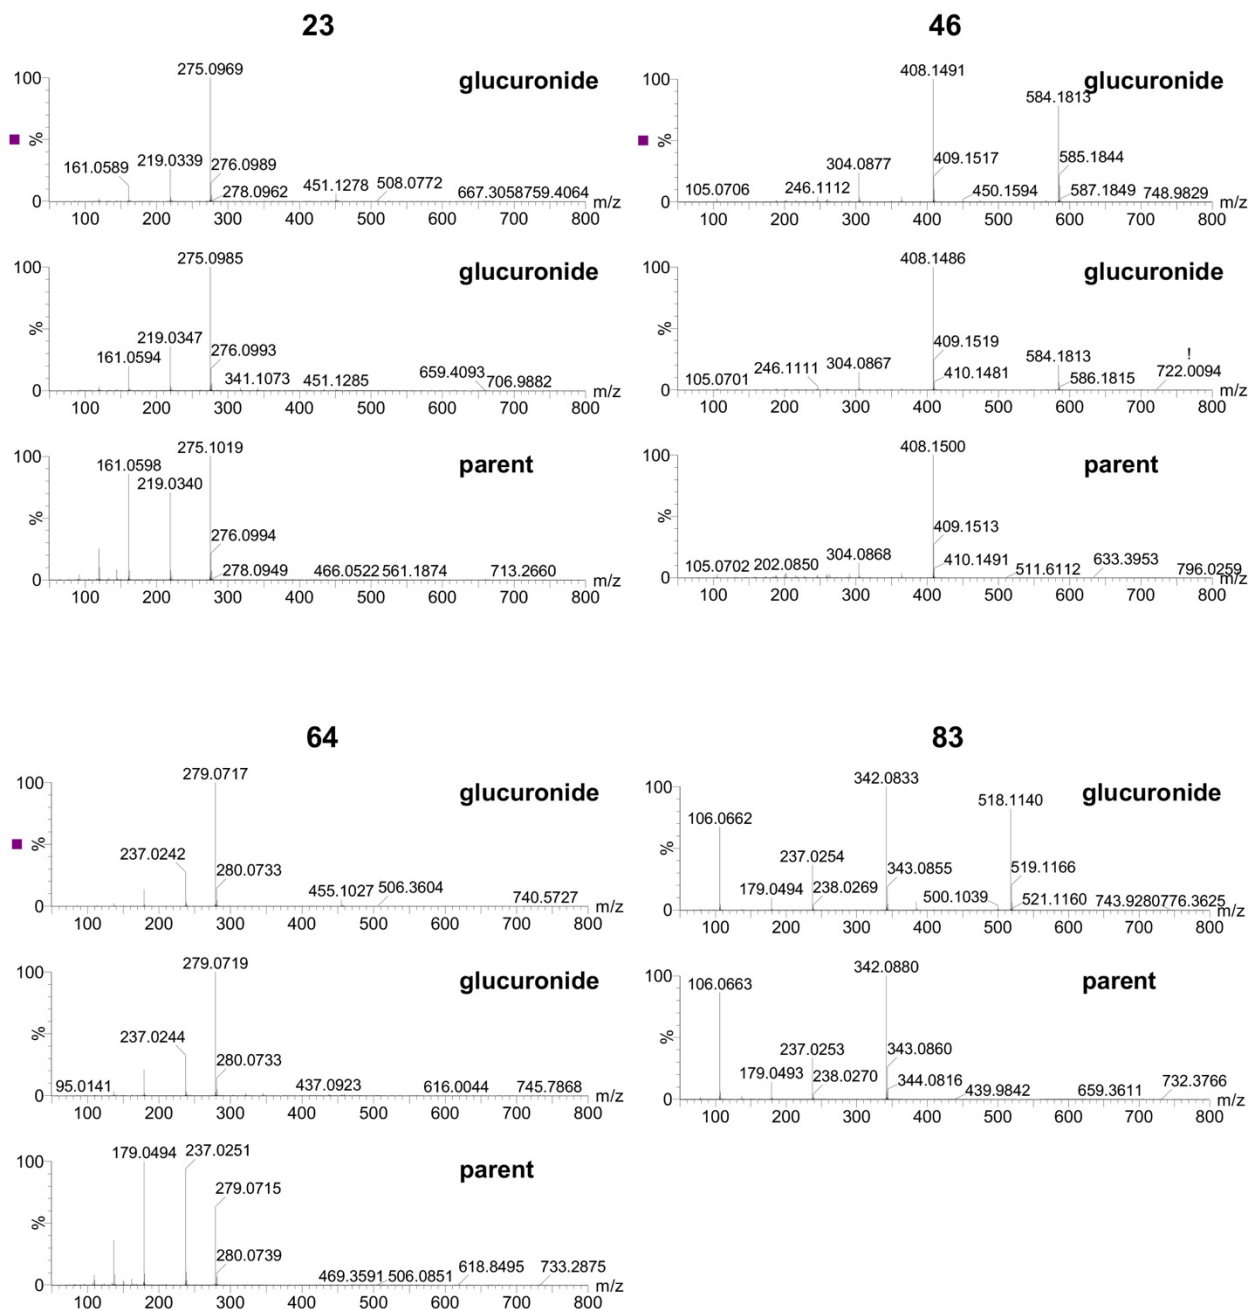

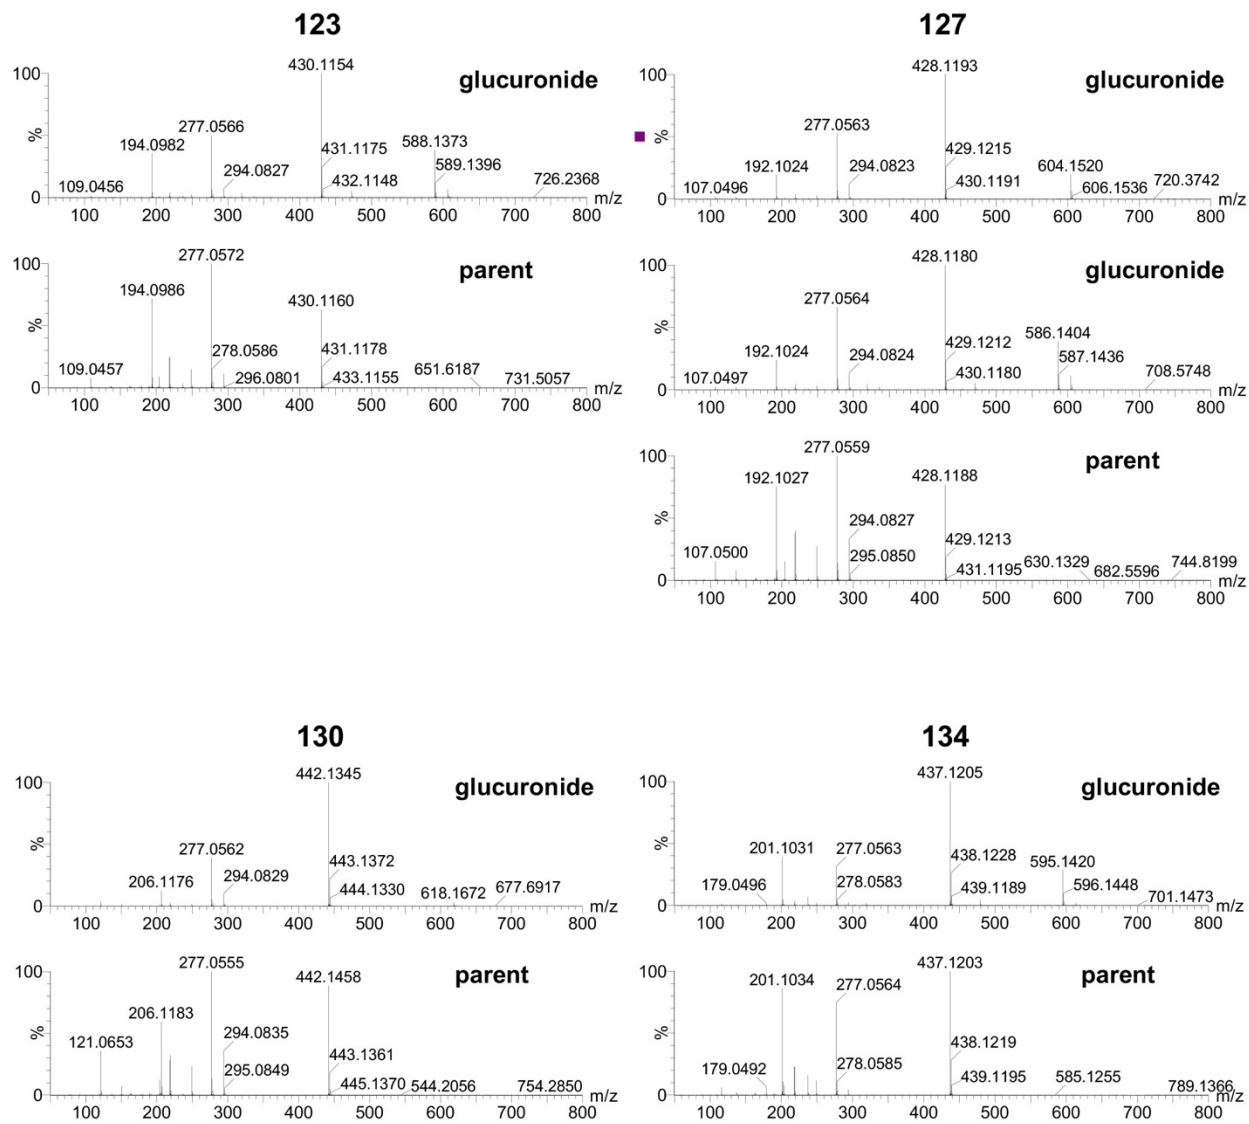

**Figure S2.** MS/MS spectrum of selected compounds and their glucuronides. Upper panel shows the MS/MS pattern of the glucuronide ion and lower panel shows the MS/MS pattern of the parent ion.

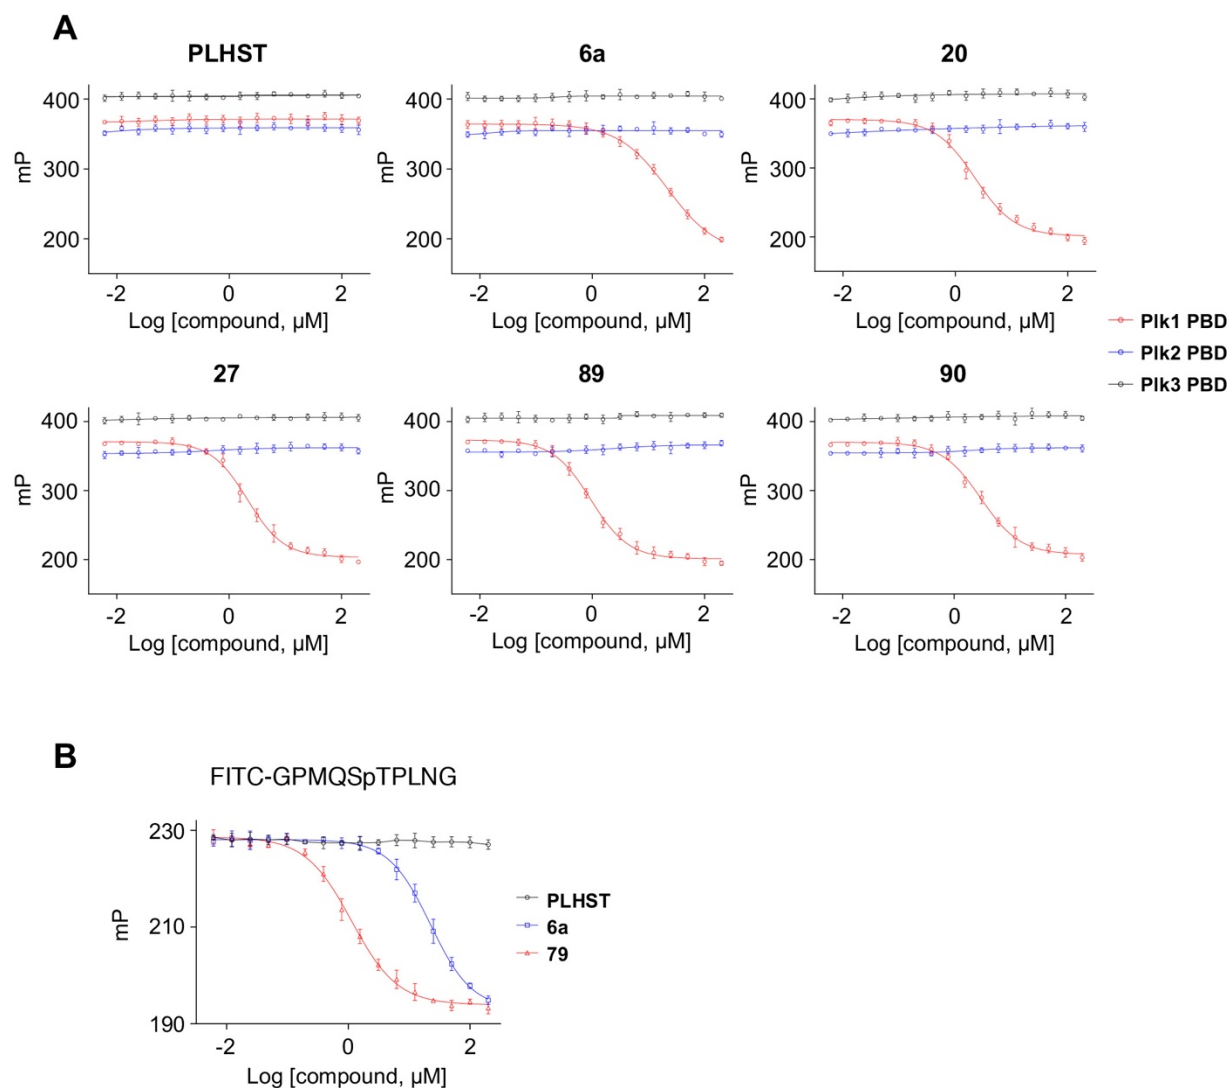

**Figure S3.** FP Comparative FP-based assays showing the ability of additional triazoloquinazolinone-derived compounds (**20**, **27**, **89**, and **90**) to specifically inhibit Plk1 PBD. (A) The FP assays shown here were performed currently with those in Figure 3 and therefore the data for control PLHST and **6a** are shown again. (B) To confirm anti-Plk1 PBD activity observed with the FITC-Ahx-DPPLHSpTAI-NH<sub>2</sub> ligand in (A), a second Plk1 PBD-binding ligand (FITC-Ahx-GPMQSpTPLNG-NH<sub>2</sub>)<sup>25</sup> was used to carry out the assay. All the data shown in (A) and (B) are quantified from three independent experiments. Bars, mean  $\pm$  standard deviation.

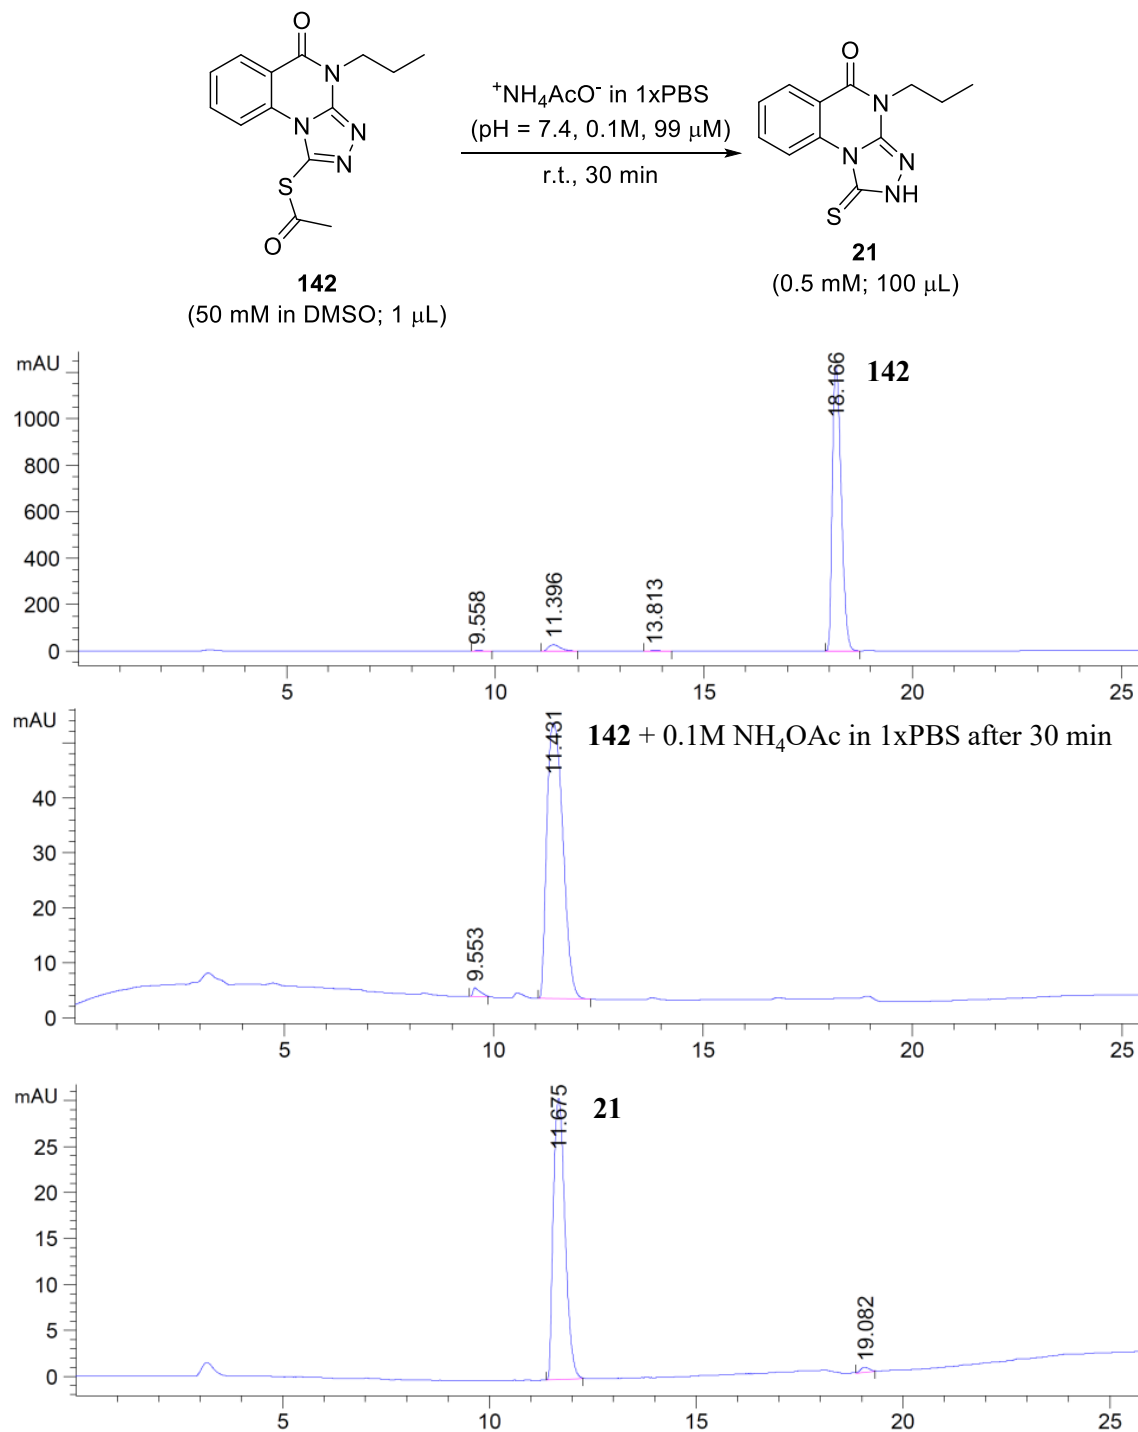

**Figure S4.** Acyl-transfer from **142**. (Upper Graph) HPLC chromatogram of **142**. (Middle Graph) HPLC chromatogram of compound **142** + 0.1M Ammonium acetate in 1xPBS after 30 min. (Lower Graph) HPLC chromatogram of **21**.

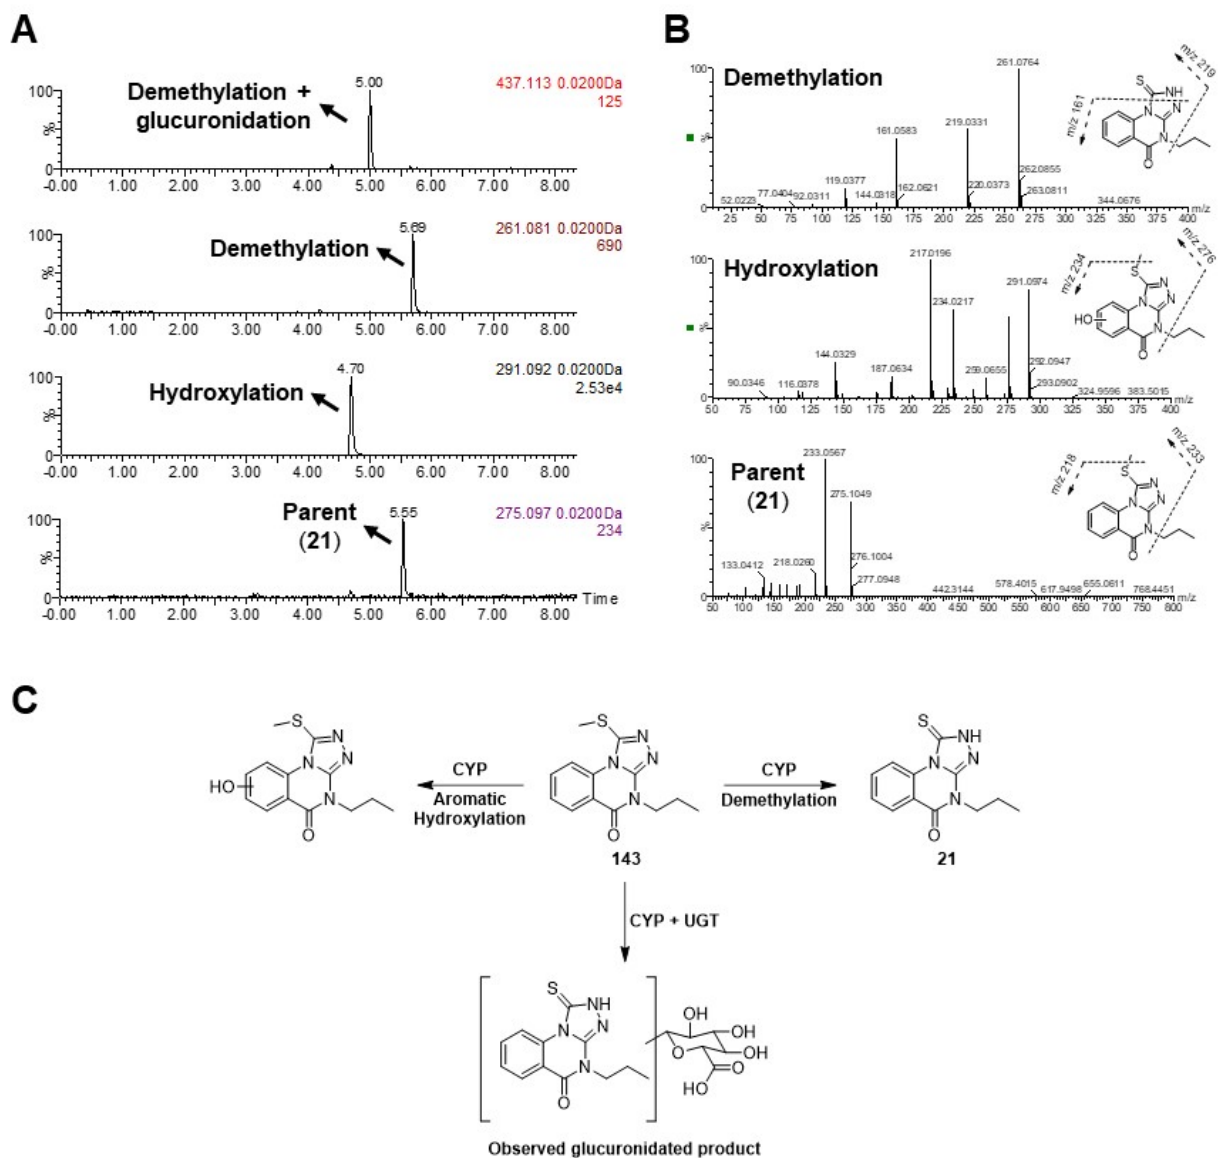

**Figure S5.** (A) Extracted ion chromatograms of **143** and its metabolites in MLM incubations with NADPH and UDPGA after 60 min. (B) MS/MS spectrum of **143**, its hydroxylated metabolite and its demethylated metabolite. (C) Proposed metabolic pathways of **143** in mice.



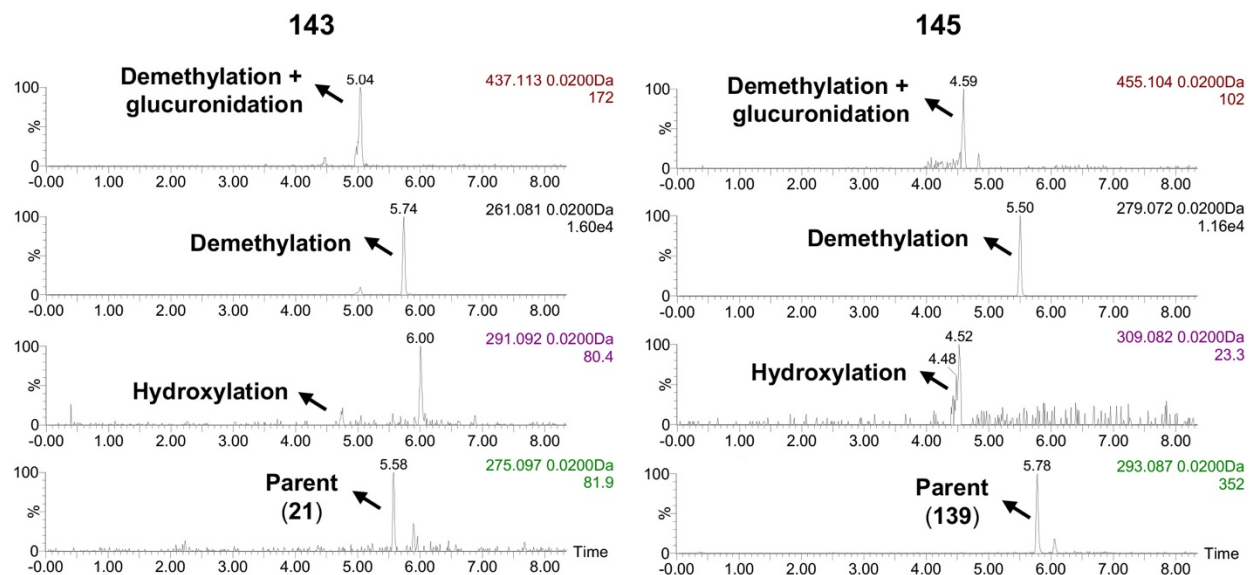

**Figure S6.** (A) Extracted ion chromatograms of **143** and its metabolites from MS after 20 mg/kg IP injection of C57BL/6 mice analyzed 4 hours post injection. (B) Extracted ion chromatograms of **145** and its metabolites from MS after 20 mg/kg IP injection of C57BL/6 mice analyzed 4 hours post injection.

## Supplementary Tables

Table S1. Inactive *S*-alkylated compounds

| Inactives (ELISA IC <sub>50</sub> >50 μM)                                           |                                                                                     |                                                                                      |                                                                                       |
|-------------------------------------------------------------------------------------|-------------------------------------------------------------------------------------|--------------------------------------------------------------------------------------|---------------------------------------------------------------------------------------|
| 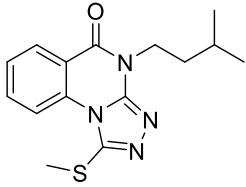   |    |    |    |
|    |    |    |    |
|   |   |   |   |
|  |  |  |  |

**Table S2.** Multi species microsomal and cytosol stability of selected compounds

| <b>Cmpd</b> | <b><i>t</i><sub>1/2</sub> Human LM (min)</b>      | <b><i>t</i><sub>1/2</sub> Mouse LM (min)</b>      | <b><i>t</i><sub>1/2</sub> Rat LM (min)</b>      |
|-------------|---------------------------------------------------|---------------------------------------------------|-------------------------------------------------|
| <b>21</b>   | >120                                              | >120                                              | >120                                            |
| <b>64</b>   | >120                                              | >120                                              | 119.71                                          |
| <b>68</b>   | >120                                              | >120                                              | 106.37                                          |
| <b>69</b>   | >120                                              | 88.35                                             | >120                                            |
| <b>80</b>   | 50.83                                             | 105.09                                            | >120                                            |
| <b>130</b>  | >120                                              | 78.19                                             | 54.81                                           |
| <b>134</b>  | >120                                              | >120                                              | >120                                            |
| <b>143</b>  | 16.80                                             | 3.77                                              | 9.41                                            |
| <b>144</b>  | 14.45                                             | 10.58                                             | 26.36                                           |
|             | <b><i>t</i><sub>1/2</sub> Human cytosol (min)</b> | <b><i>t</i><sub>1/2</sub> Mouse cytosol (min)</b> | <b><i>t</i><sub>1/2</sub> Rat cytosol (min)</b> |
| <b>21</b>   | >120                                              | >120                                              | >120                                            |
| <b>64</b>   | >120                                              | >120                                              | >120                                            |
| <b>68</b>   | >120                                              | >120                                              | >120                                            |
| <b>69</b>   | 118.48                                            | 97.58                                             | >120                                            |
| <b>80</b>   | >120                                              | >120                                              | >120                                            |
| <b>130</b>  | >120                                              | >120                                              | >120                                            |
| <b>134</b>  | >120                                              | 103.84                                            | >120                                            |
| <b>143</b>  | >120                                              | >120                                              | >120                                            |
| <b>144</b>  | >120                                              | >120                                              | >120                                            |

**Table S3.** In vitro and in vivo stability of selected prodrugs in mice

| <b>Cmpd</b> | <b><i>t</i><sub>1/2</sub> in vitro (min)</b> | <b><i>t</i><sub>1/2</sub> in vivo (min)</b> |
|-------------|----------------------------------------------|---------------------------------------------|
| <b>143</b>  | 11.37 ± 3.49                                 | 28.74 ± 8.30                                |
| <b>145</b>  | 21.80 ± 6.03                                 | 51.26 ± 11.23                               |

## HPLC purity, NMR and HRMS for compound 7

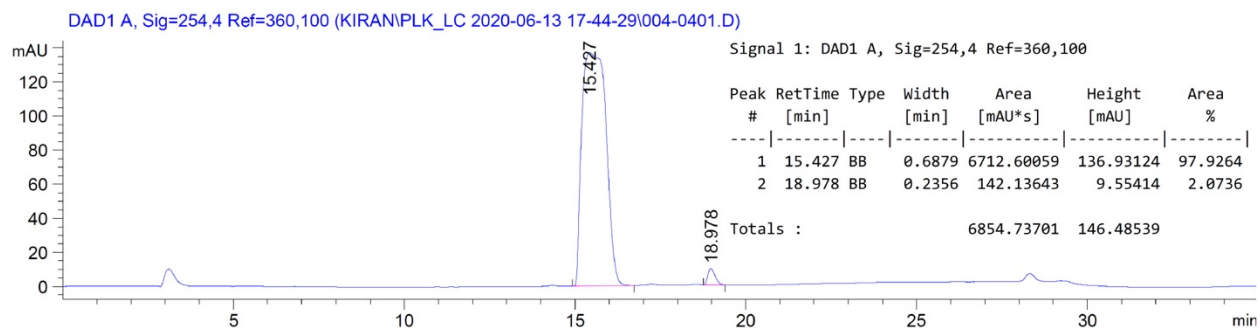

<sup>1</sup>H NMR (400 MHz, DMSO-d<sub>6</sub>) δ 14.10 (s, 1H), 10.23 (ddd, J=8.5, 1.1, 0.5 Hz, 1H), 8.35–8.14 (m, 1H), 7.92 (ddd, J=8.5, 7.3, 1.7 Hz, 1H), 7.63 (ddd, J=7.9, 7.4, 1.1 Hz, 1H), 7.42–7.13 (m, 5H), 4.36–4.11 (m, 2H), 3.11–2.91 (m, 2H).

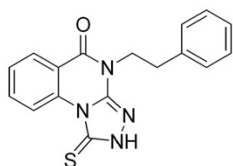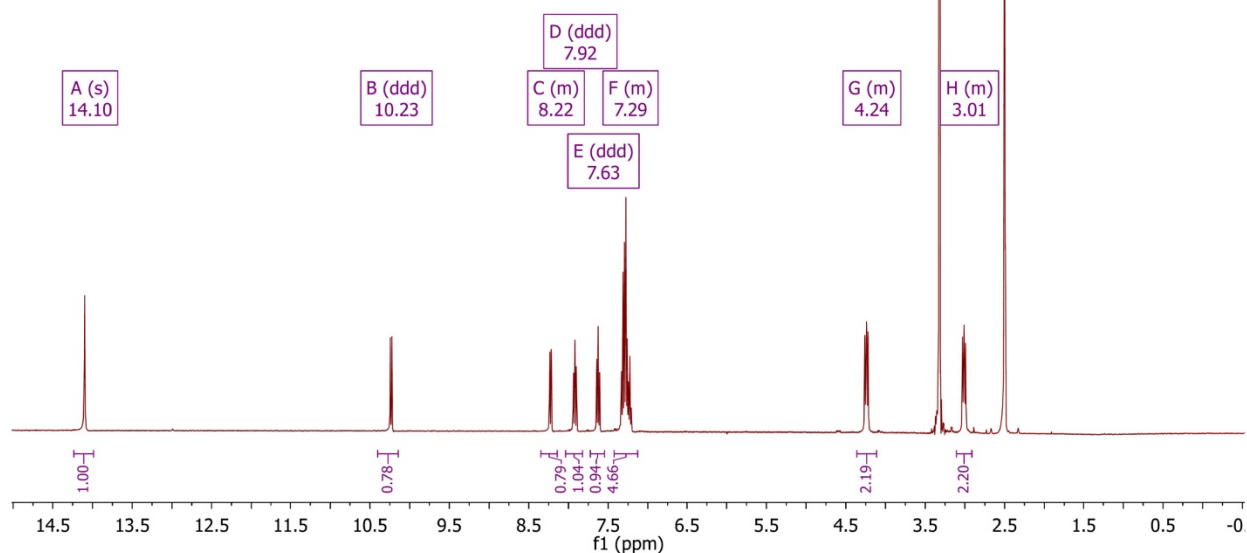

kst-28jul17-mrs-5308 170 (3.144) Cn (Cen,5, 50.00, Ar); Sm (SG, 3x5.00); Sb (12.5.00)

TOF MS ES+  
4.24e+003

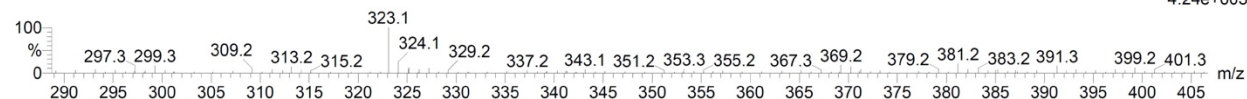

Minimum: -2.0  
Maximum: 10.0 10.0 1000.0

| Mass     | Calc. Mass | mDa  | PPM   | DBE  | i-FIT | Formula           |
|----------|------------|------|-------|------|-------|-------------------|
| 323.0973 | 323.0967   | 0.6  | 1.9   | 12.5 | 122.7 | C17 H15 N4 O 32S  |
|          | 323.1025   | -5.2 | -16.1 | 3.5  | 222.7 | C10 H19 N4 O6 32S |



HPLC purity, NMR and HRMS for compound **22**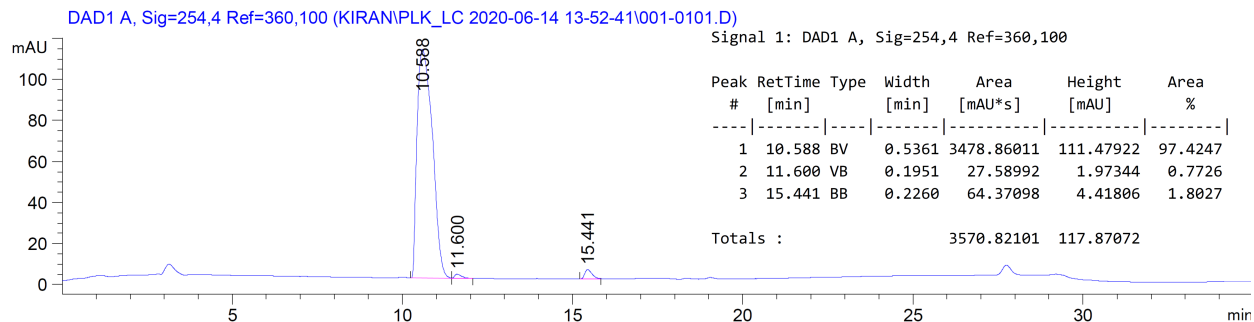

<sup>1</sup>H NMR (400 MHz, DMSO-*d*<sub>6</sub>) δ 14.06 (s, 1H), 10.24 (dd, *J* = 8.6, 1.1 Hz, 1H), 8.23 (dd, *J* = 7.9, 1.6 Hz, 1H), 7.92 (ddd, *J* = 8.7, 7.3, 1.7 Hz, 1H), 7.63 (td, *J* = 7.6, 1.1 Hz, 1H), 5.92 (ddt, *J* = 17.3, 10.4, 5.2 Hz, 1H), 5.28 (dq, *J* = 17.2, 1.5 Hz, 1H), 5.17 (dq, *J* = 10.4, 1.4 Hz, 1H), 4.65 (dt, *J* = 5.4, 1.7 Hz, 2H).

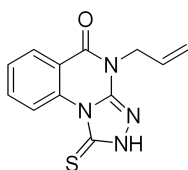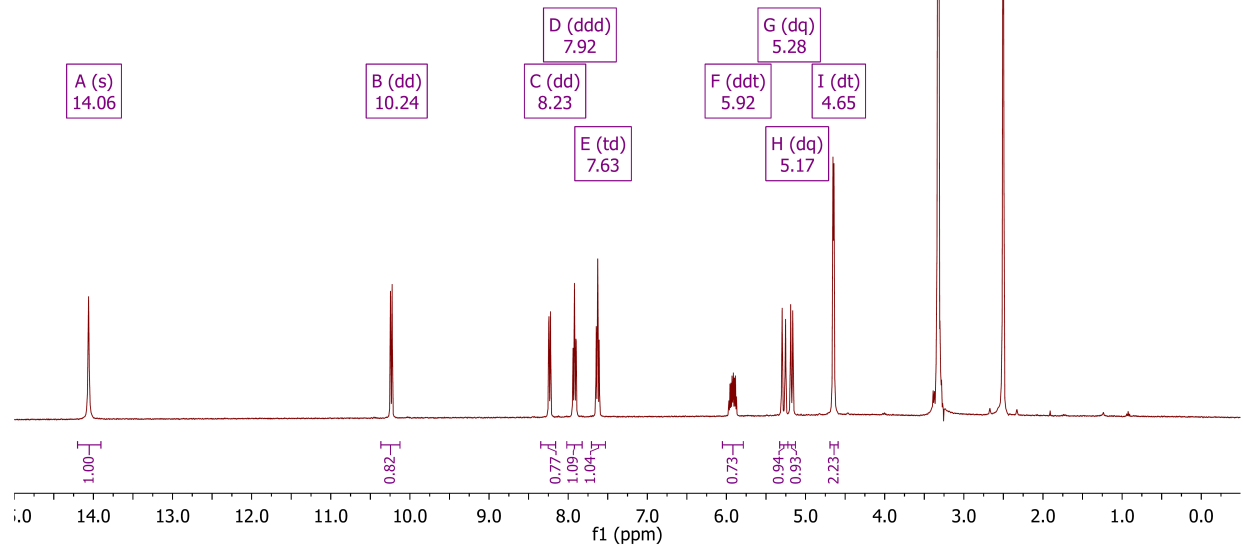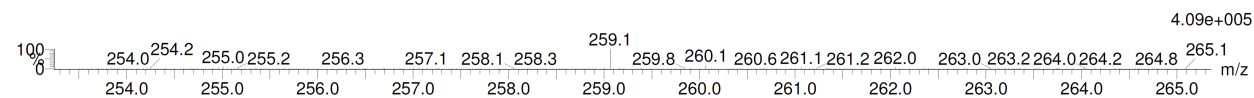

|          |            |      |      |       |       |      |         |                  |  |
|----------|------------|------|------|-------|-------|------|---------|------------------|--|
| Minimum: |            |      |      |       |       |      |         |                  |  |
| Maximum: |            | 5.0  | 5.0  | 100.0 |       |      |         |                  |  |
| Mass     | Calc. Mass | mDa  | PPM  | DBE   | i-FIT | Norm | Conf(%) | Formula          |  |
| 259.0650 | 259.0654   | -0.4 | -1.5 | 9.5   | 570.1 | n/a  | n/a     | C12 H11 N4 O 32S |  |

HPLC purity, NMR and HRMS for compound **23**

DAD1 A, Sig=254,4 Ref=360,100 (KIRAN\PLK\_LC 2020-06-18 18-52-35\PLK000003.D)

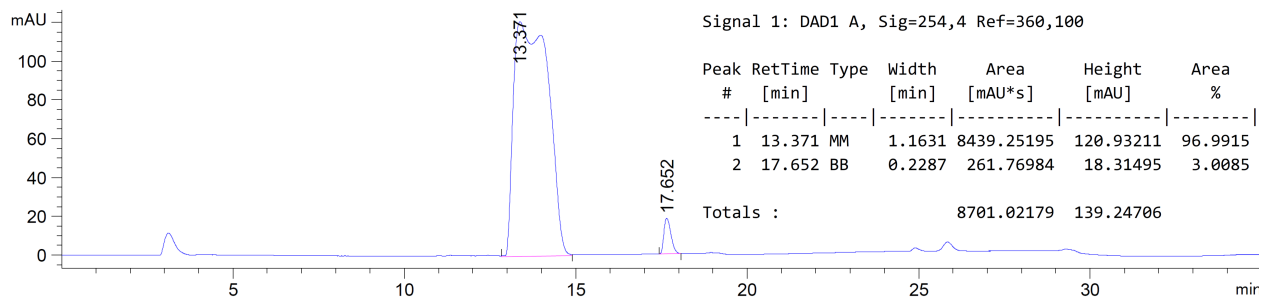

<sup>1</sup>H NMR (400 MHz, DMSO-d<sub>6</sub>) δ 14.05 (s, 1H), 10.22 (dd, *J* = 8.4, 2.6 Hz, 1H), 8.30 – 8.14 (m, 1H), 8.01 – 7.82 (m, 1H), 7.69 – 7.48 (m, 1H), 4.03 (t, *J* = 7.2 Hz, 2H), 1.69 (p, *J* = 8.0, 7.5 Hz, 2H), 1.35 (q, *J* = 7.7 Hz, 2H), 0.91 (td, *J* = 7.4, 2.5 Hz, 3H).

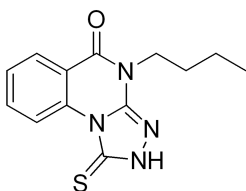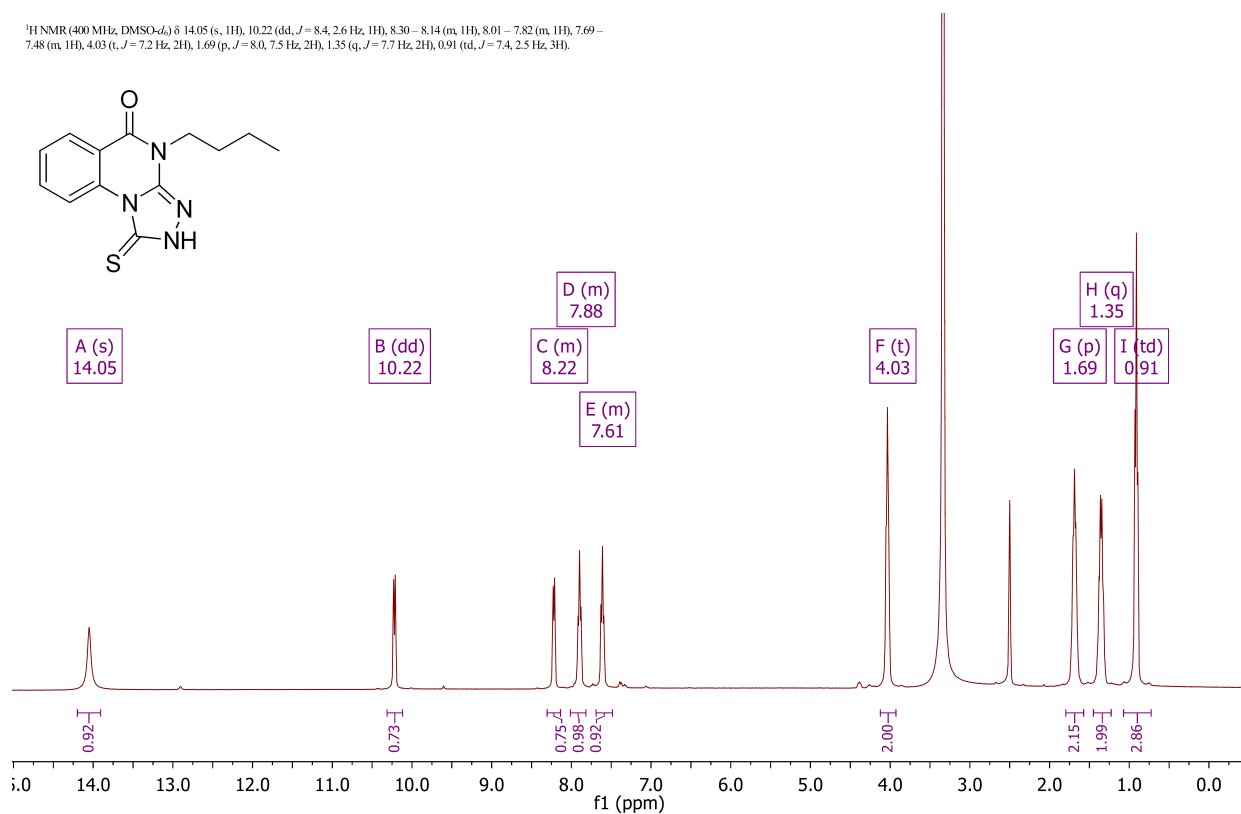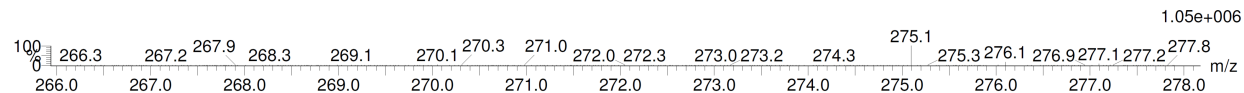

Minimum: -1.5  
Maximum: 5.0 5.0 100.0

| Mass     | Calc. Mass | mDa  | PPM  | DBE | i-FIT | Norm  | Conf (%) | Formula          |
|----------|------------|------|------|-----|-------|-------|----------|------------------|
| 275.0966 | 275.0967   | -0.1 | -0.4 | 8.5 | 532.8 | 0.565 | 56.86    | C13 H15 N4 O 32S |
|          | 275.0926   | 4.0  | 14.5 | 4.5 | 533.0 | 0.841 | 43.14    | C8 H15 N6 O3 32S |

HPLC purity, NMR and HRMS for compound **26**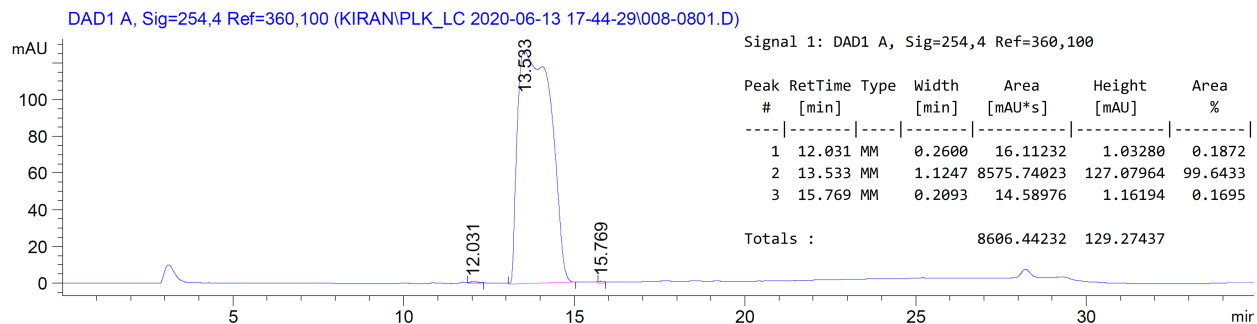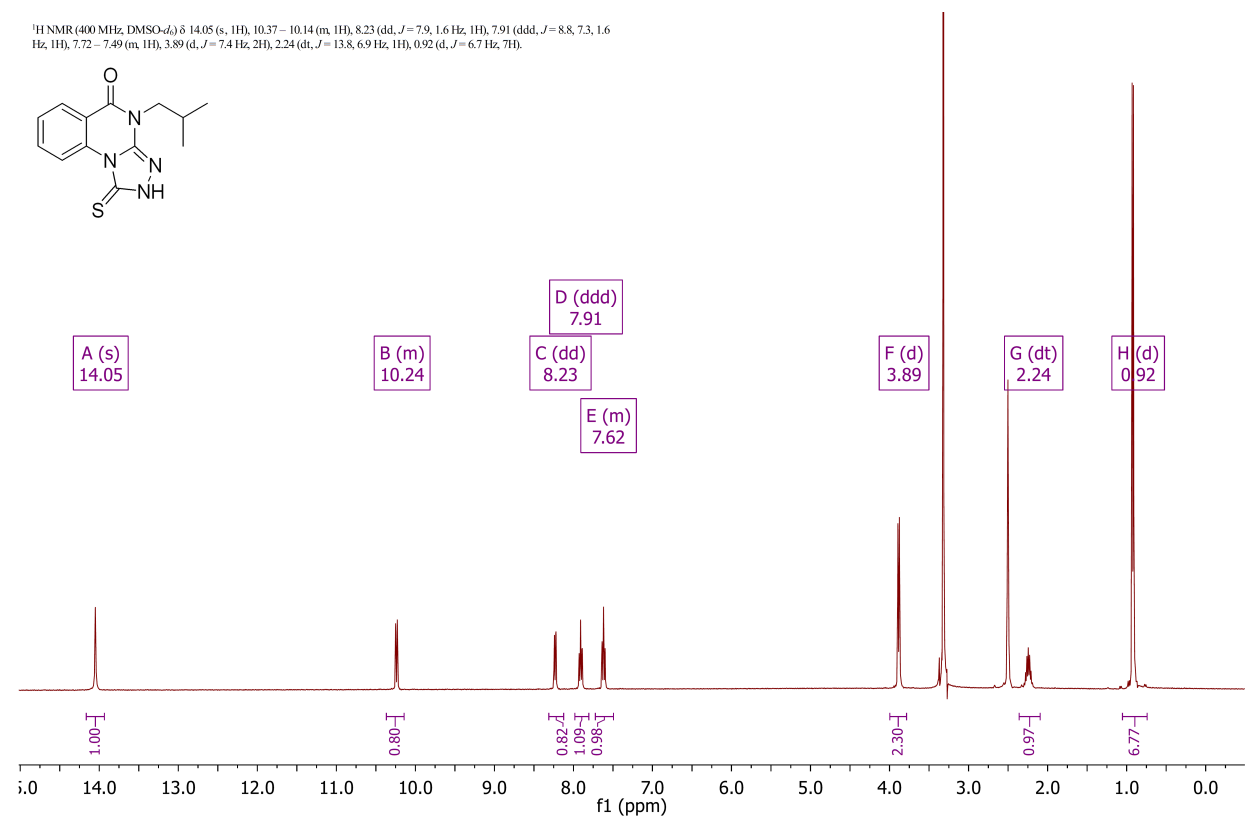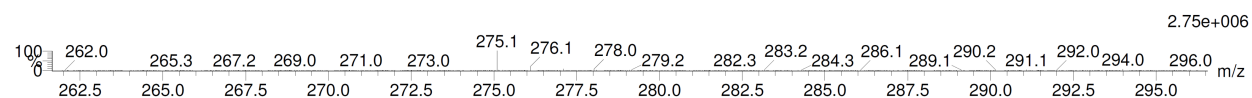

|          |            |     |     |       |       |      |          |                  |
|----------|------------|-----|-----|-------|-------|------|----------|------------------|
| Minimum: |            |     |     | -1.5  |       |      |          |                  |
| Maximum: |            | 5.0 | 5.0 | 100.0 |       |      |          |                  |
| Mass     | Calc. Mass | mDa | PPM | DBE   | i-FIT | Norm | Conf (%) | Formula          |
| 275.0970 | 275.0967   | 0.3 | 1.1 | 8.5   | 677.3 | n/a  | n/a      | C13 H15 N4 O 32S |



HPLC purity and NMR for compound **36**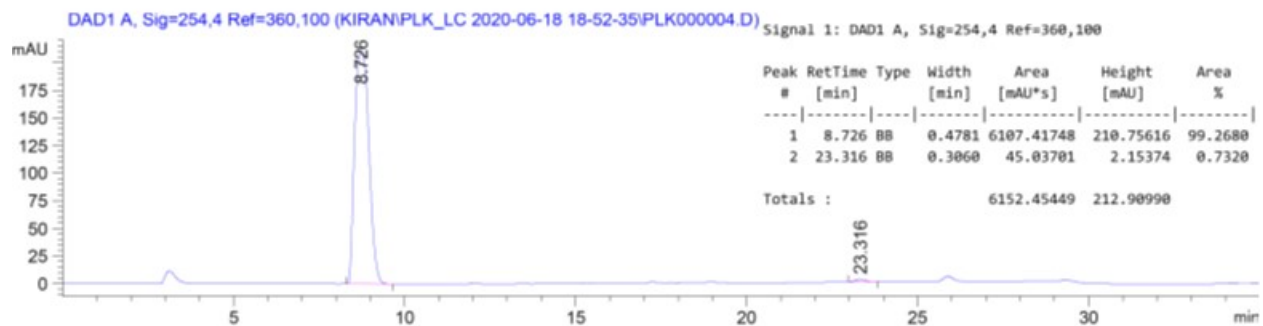

<sup>1</sup>H NMR (400 MHz, DMSO-d<sub>6</sub>) δ 10.30 (d, *J* = 8.5 Hz, 1H), 8.31 – 8.15 (m, 1H), 7.96 – 7.80 (m, 1H), 7.62 (t, *J* = 7.8 Hz, 1H), 5.17 (d, *J* = 2.2 Hz, 2H), 3.46 (t, *J* = 1.9 Hz, 3H), 2.62 (t, *J* = 7.2 Hz, 2H), 1.52 (q, *J* = 7.4 Hz, 2H), 0.86 (t, *J* = 7.4, 2.0 Hz, 3H).

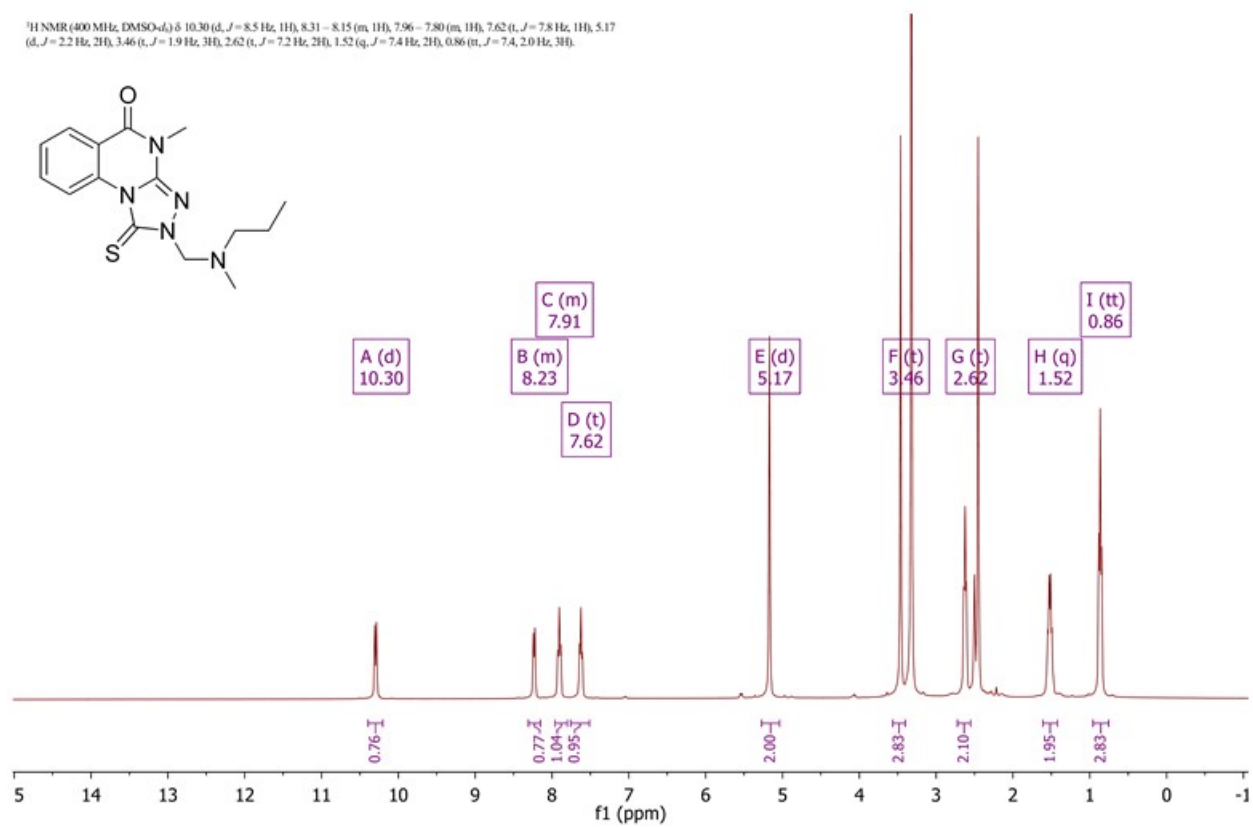

HPLC purity, NMR and HRMS for compound **64**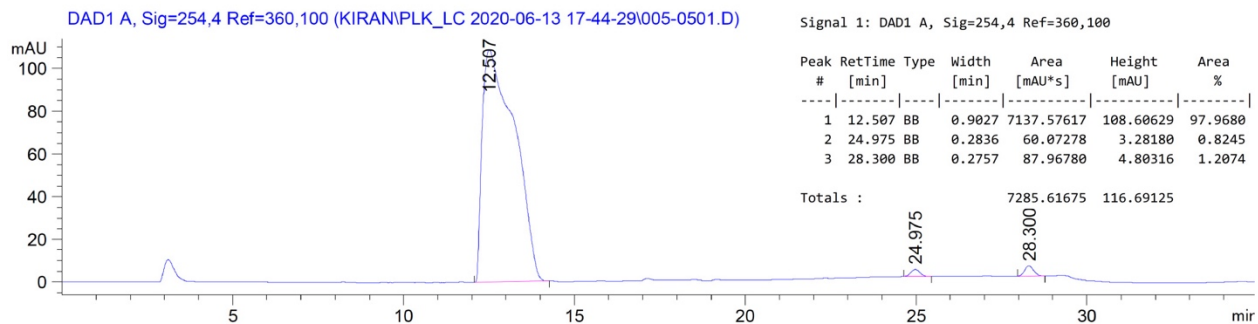

<sup>1</sup>H NMR (400 MHz, DMSO-d<sub>6</sub>) δ 14.12 (s, 1H), 10.31 (dd, *J* = 9.3, 4.7 Hz, 1H), 7.94 (dd, *J* = 8.6, 3.1 Hz, 1H), 7.82 (ddd, *J* = 9.3, 8.0, 3.1 Hz, 1H), 4.10 – 3.91 (m, 2H), 1.84 – 1.61 (m, 2H), 0.92 (t, *J* = 7.5 Hz, 3H).

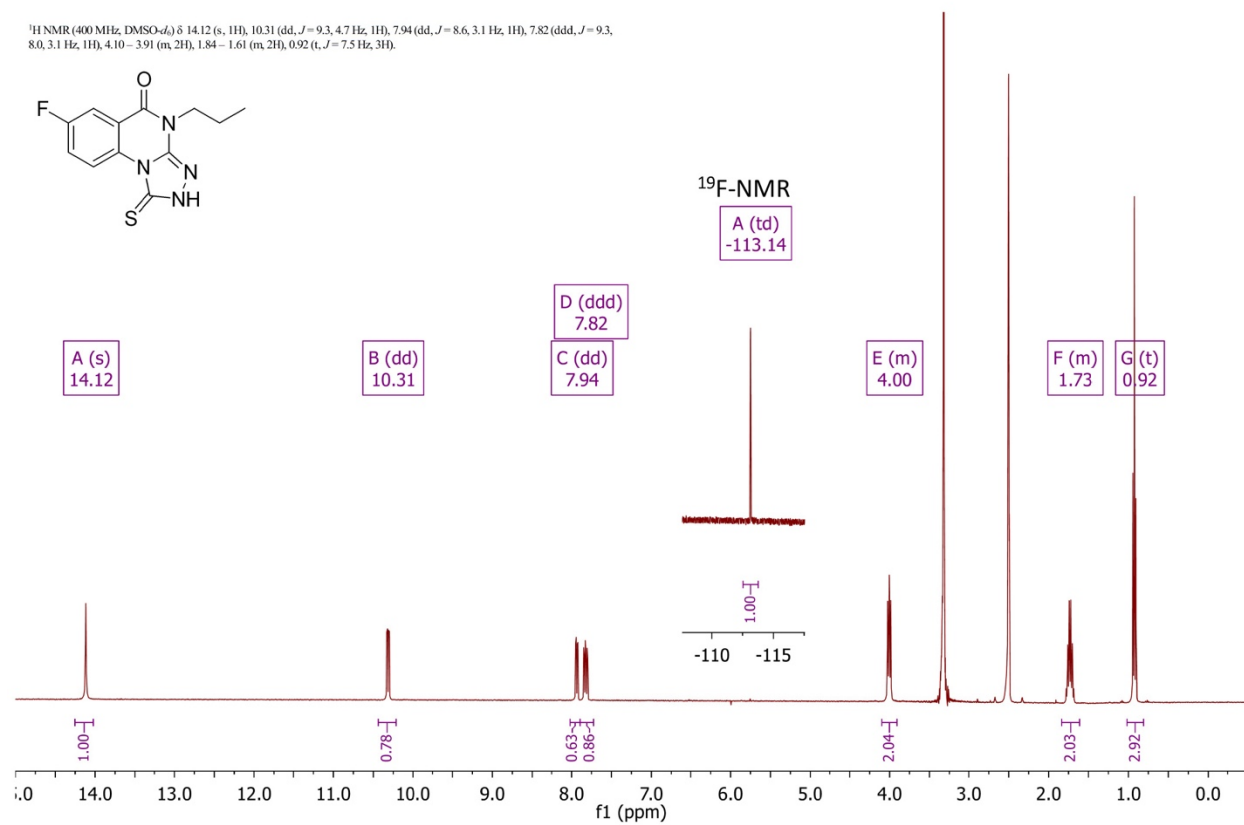

HPLC purity and NMR for compound **65**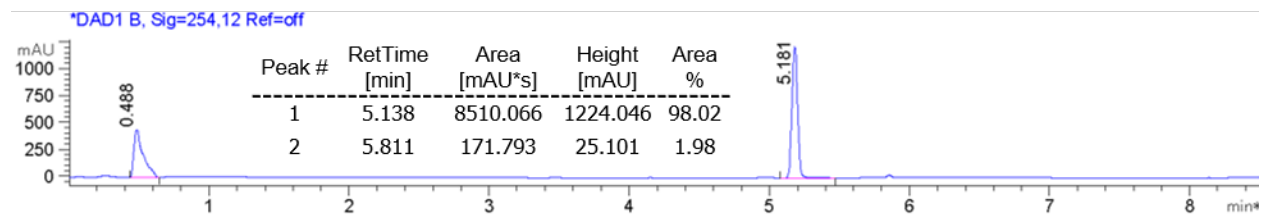

cna002-074\_PROTON\_01

<sup>1</sup>H NMR (400 MHz, dms<sub>o</sub>) δ 10.27 (d, *J* = 8.4 Hz, 1H), 7.93 (dd, *J* = 8.6, 3.0 Hz, 1H), 7.82 (td, *J* = 9.3, 8.7, 3.1 Hz, 1H), 4.25 (t, *J* = 7.3 Hz, 2H), 2.72 (dtd, *J* = 18.6, 11.3, 7.7 Hz, 2H).

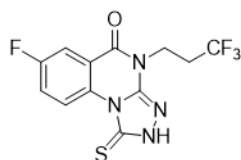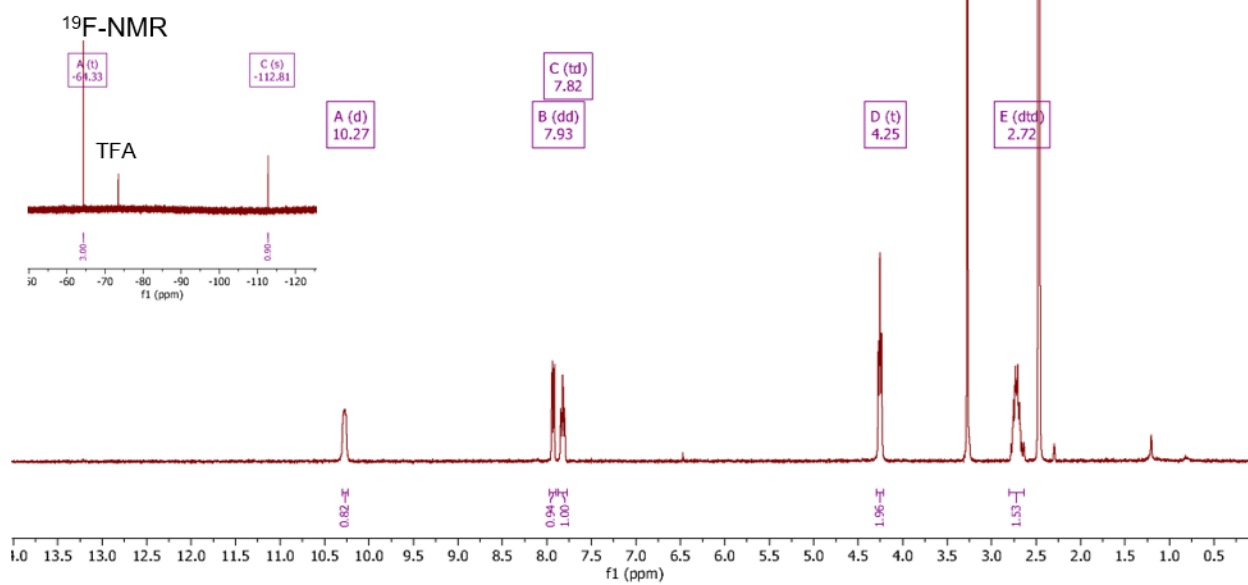

HPLC purity and NMR for compound **79**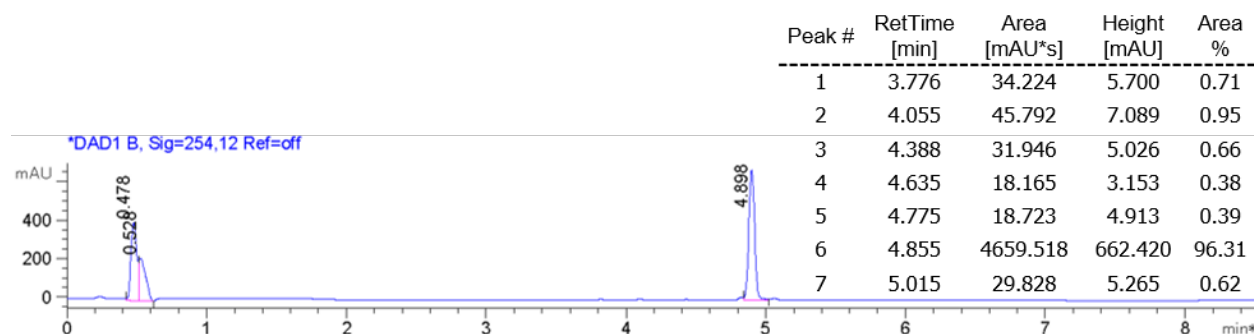

CNA003-054\_PROTON\_01

$^1\text{H}$  NMR (400 MHz,  $\text{dms}\text{-}d_6$ )  $\delta$  10.29 (dd,  $J=9.3, 4.7$  Hz, 1H), 7.92 (dd,  $J=8.6, 3.1$  Hz, 1H), 7.80 (ddd,  $J=9.2, 7.9, 3.1$  Hz, 1H), 3.92 (d,  $J=7.1$  Hz, 2H), 1.27 (s, 1H), 0.49–0.37 (m, 4H).

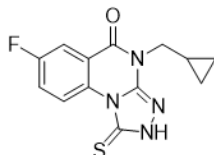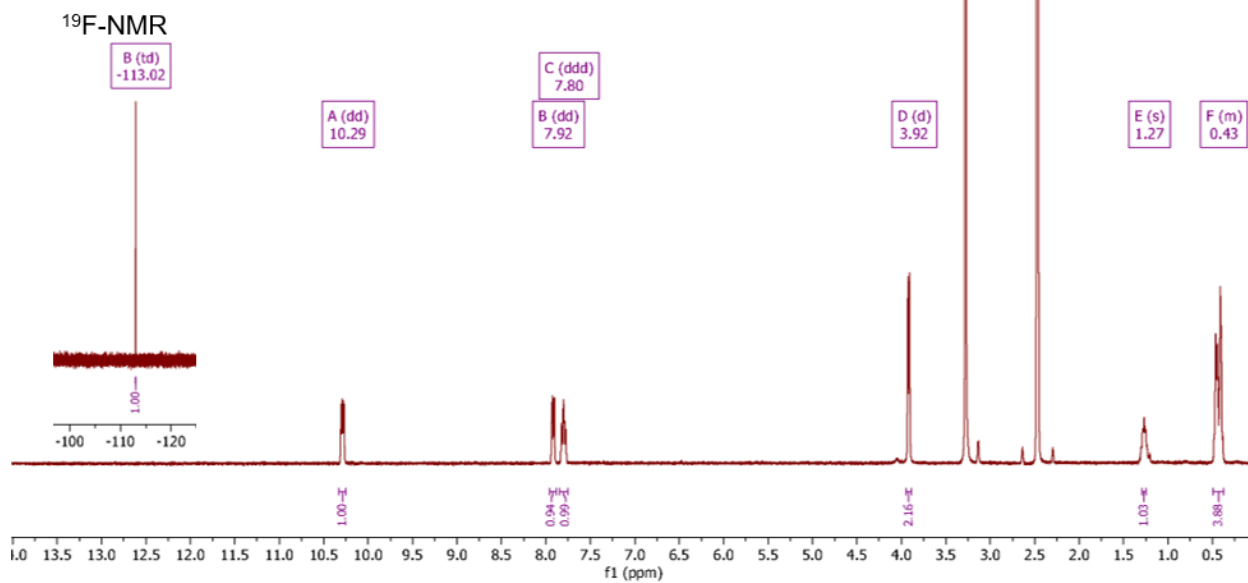

HPLC purity and NMR for compound **83**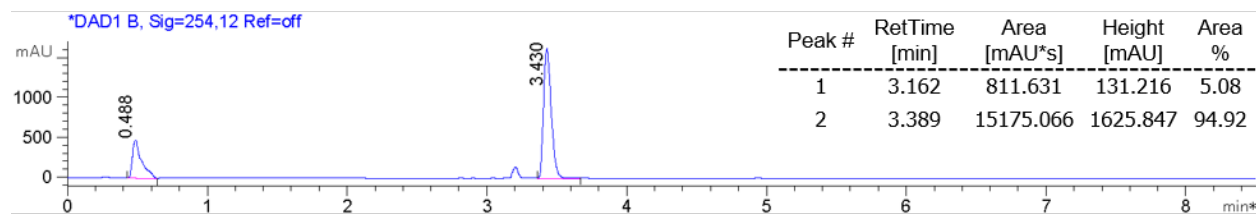

cna002-068\_PROTON\_01

<sup>1</sup>H NMR (400 MHz, dms<sub>o</sub>) δ 10.29 (dd, *J* = 9.3, 4.7 Hz, 1H), 8.46 (d, *J* = 4.9 Hz, 1H), 7.88 (dd, *J* = 8.6, 3.1 Hz, 1H), 7.80 (td, *J* = 8.6, 3.1 Hz, 1H), 7.76–7.73 (m, 1H), 7.36 (d, *J* = 7.8 Hz, 1H), 7.29–7.24 (m, 1H), 4.37 (t, *J* = 7.6 Hz, 2H), 3.20–3.11 (m, 2H).

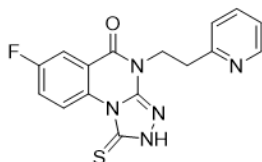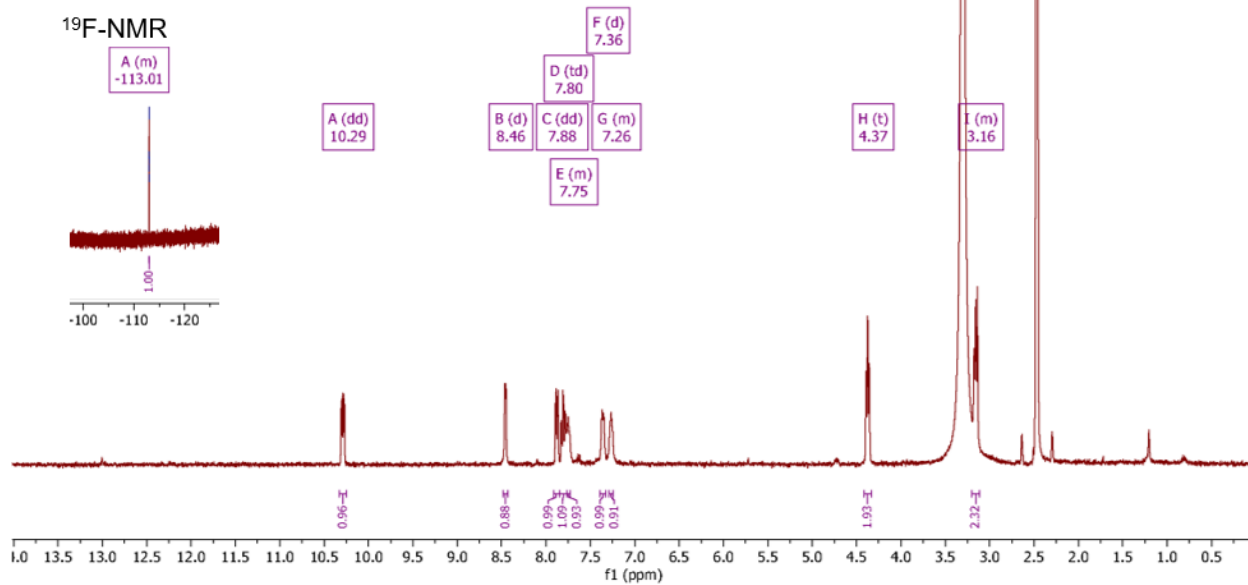

HPLC purity and NMR for compound **85**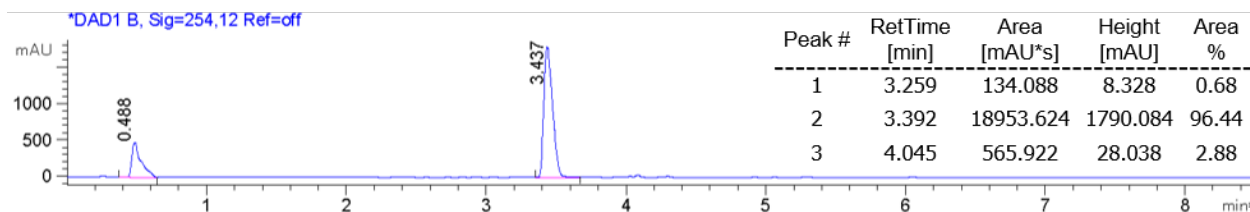

cna002-078\_PROTON\_01

<sup>1</sup>H NMR (400 MHz, dms<sub>o</sub>) δ 10.30 (dd, *J* = 9.3, 4.7 Hz, 1H), 8.65 – 8.59 (m, 2H), 7.91 – 7.77 (m, 2H), 7.66 (d, *J* = 5.5 Hz, 2H), 4.34 (t, *J* = 7.1 Hz, 2H), 3.17 (t, *J* = 7.1 Hz, 2H).

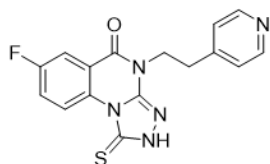<sup>19</sup>F-NMR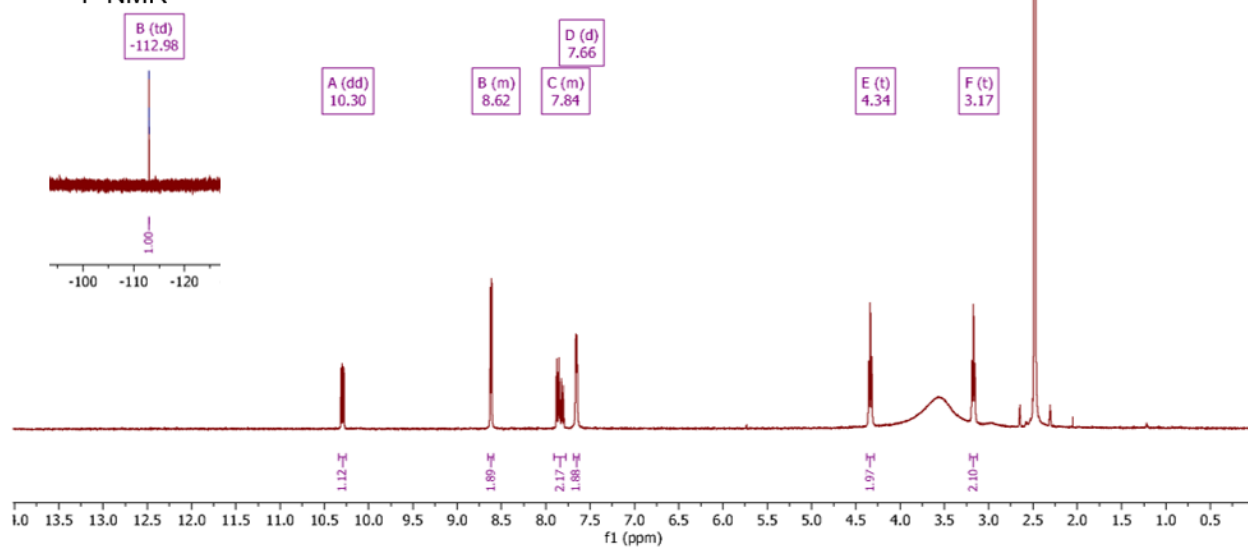

HPLC purity and NMR for compound **129**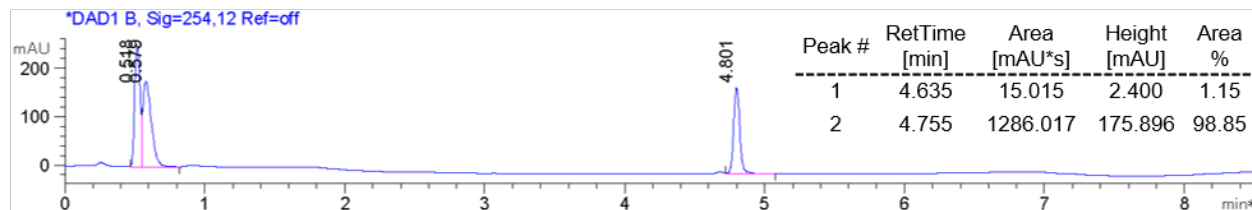

CNA007-058\_PROTON\_01

<sup>1</sup>H NMR (400 MHz, DMSO-d<sub>6</sub>) δ 10.29 (dd, *J* = 9.3, 4.7 Hz, 1H), 8.01 (t, *J* = 5.7 Hz, 1H), 7.91 (dd, *J* = 8.6, 3.1 Hz, 1H), 7.80 (ddd, *J* = 9.3, 7.9, 3.1 Hz, 1H), 7.22 – 7.13 (m, 1H), 6.82 – 6.73 (m, 3H), 4.03 (t, *J* = 7.3 Hz, 2H), 3.71 (s, 3H), 3.33 (s, 2H), 3.12 (q, *J* = 6.7 Hz, 2H), 1.84 (p, *J* = 7.2 Hz, 2H).

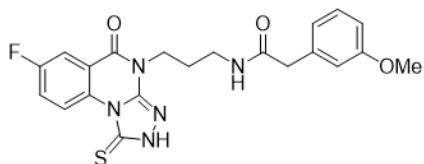<sup>19</sup>F-NMR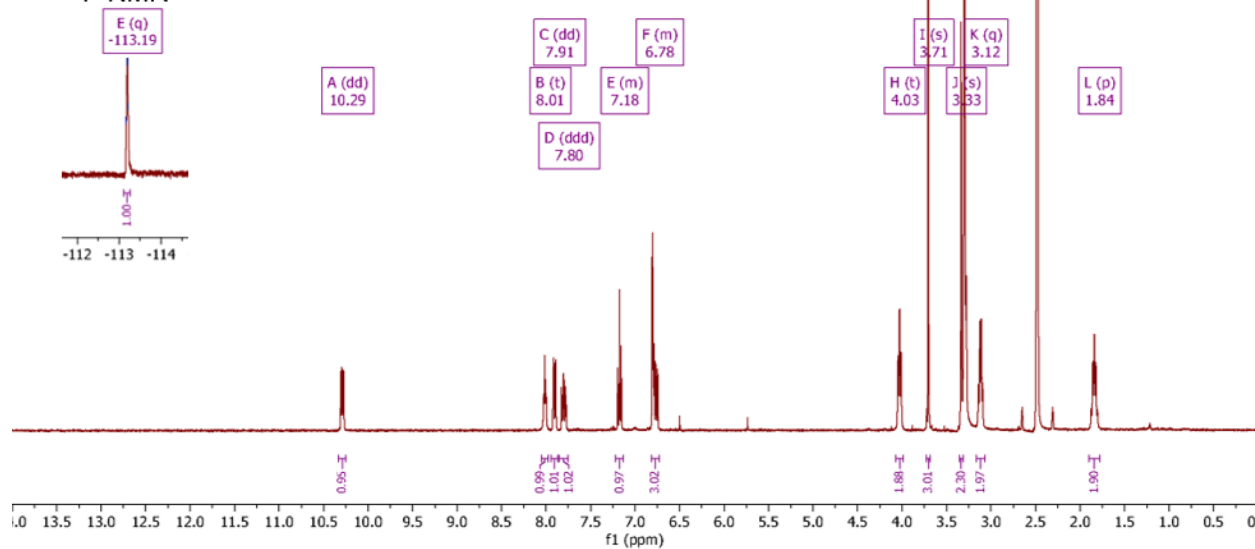

HPLC purity and NMR for compound **134**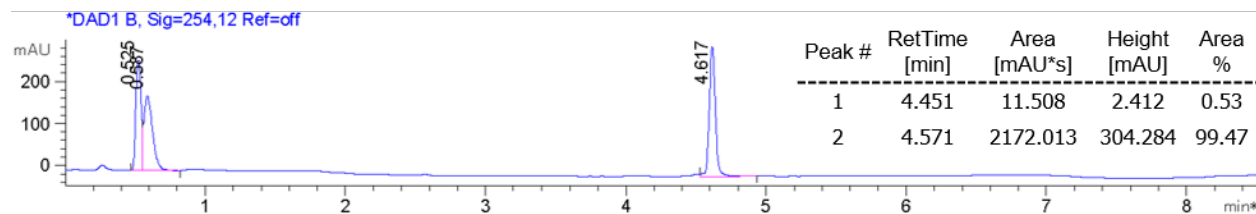

CNA007-062\_PROTON\_01

<sup>1</sup>H NMR (400 MHz, dms<sub>o</sub>) δ 10.29 (dd, *J* = 9.3, 4.7 Hz, 1H), 8.16 (t, *J* = 5.6 Hz, 1H), 7.91 (dd, *J* = 8.6, 3.1 Hz, 1H), 7.80 (ddd, *J* = 9.3, 8.0, 3.1 Hz, 1H), 7.79 – 7.72 (m, 2H), 7.47 – 7.40 (m, 2H), 4.02 (t, *J* = 7.3 Hz, 2H), 3.50 (s, 2H), 3.18 – 3.09 (m, 2H), 1.84 (p, *J* = 7.1 Hz, 2H).

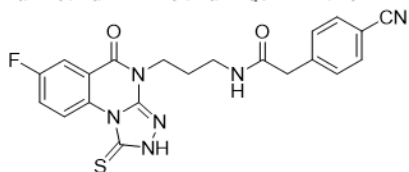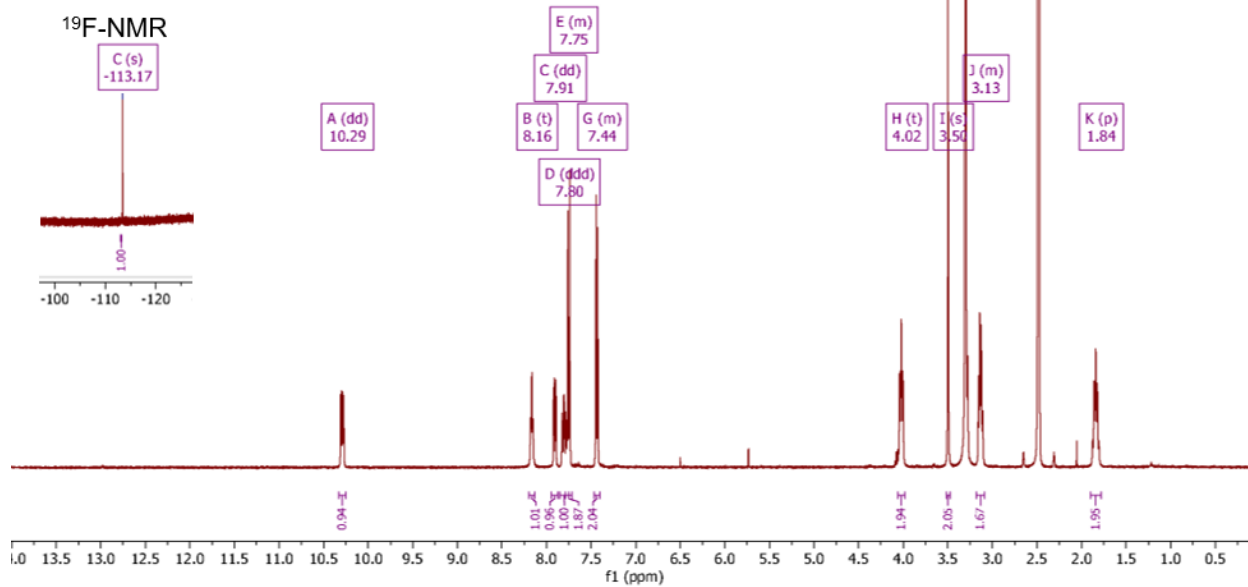

Supplement: NIHMS1654399-supplement-Supplementary_Material.pdf [file NIHMS1654399-supplement-Supplementary_Material.pdf]
